# Supplementary material for: Particle size distribution of workplace aerosols in manganese alloy smelters applying a personal sampling strategy
Source: Royal Society of Chemistry journal article supplement (doi:10.1039/c5em00396b), 2015-01-01

## Particle size distribution of workplace aerosols in manganese alloy smelters applying personal sampling strategy

### Supplement

Table S1

PM mass distribution parameters in the Mn alloy smelters calculated from the deposited masses on all stages of the Sioutas cascade impactors under assumption of a single lognormal distribution (Hinds, 1999). Note the extremely high GSD values produced by the lognormal assumption due to the high mass content of the 2.5  $\mu\text{m}$  – 10  $\mu\text{m}$  size range.

|                                          | AM <sup>b</sup>   | 95% CI <sup>c</sup>     | Min.              | Max.              |
|------------------------------------------|-------------------|-------------------------|-------------------|-------------------|
| Mn alloy smelter 1 (N <sup>a</sup> = 19) |                   |                         |                   |                   |
| MMAD <sup>d</sup>                        | 2.7 $\mu\text{m}$ | 2.1 – 3.4 $\mu\text{m}$ | 0.9 $\mu\text{m}$ | 5.2 $\mu\text{m}$ |
| GSD <sup>e</sup>                         | 8.5               | 6.8 – 10.2              | 3.1               | 15.4              |
| Mn alloy smelter 2 (N = 18)              |                   |                         |                   |                   |
| MMAD                                     | 3.0 $\mu\text{m}$ | 2.1 – 4.0 $\mu\text{m}$ | 0.6 $\mu\text{m}$ | 7.8 $\mu\text{m}$ |
| GSD                                      | 16.7              | 6.9 – 26.5              | 5.1               | 85.4              |
| Smelter 1+2 (N = 37)                     |                   |                         |                   |                   |
| MMAD                                     | 2.9 $\mu\text{m}$ | 2.3 – 3.4 $\mu\text{m}$ | 0.6 $\mu\text{m}$ | 7.8 $\mu\text{m}$ |
| GSD                                      | 12.5              | 7.5 – 17.4              | 3.1               | 85.4              |

<sup>a</sup> Number of measurements

<sup>b</sup> Arithmetic mean

<sup>c</sup> Central 95 % confidence interval

<sup>d</sup> Mass median aerodynamic diameter

<sup>e</sup> Geometric standard deviation

### Reference

W. C. Hinds, *Aerosol Technology: Properties, Behavior, and Measurement of Airborne Particles*, Wiley, New York, NY, USA, 2<sup>nd</sup> edn., 1999

Fig. S1 Particle mass concentration distributions measured by SMPS in the Mn alloy smelters (1.2 g cm<sup>-3</sup> as density of the particles was used in the mass calculations)

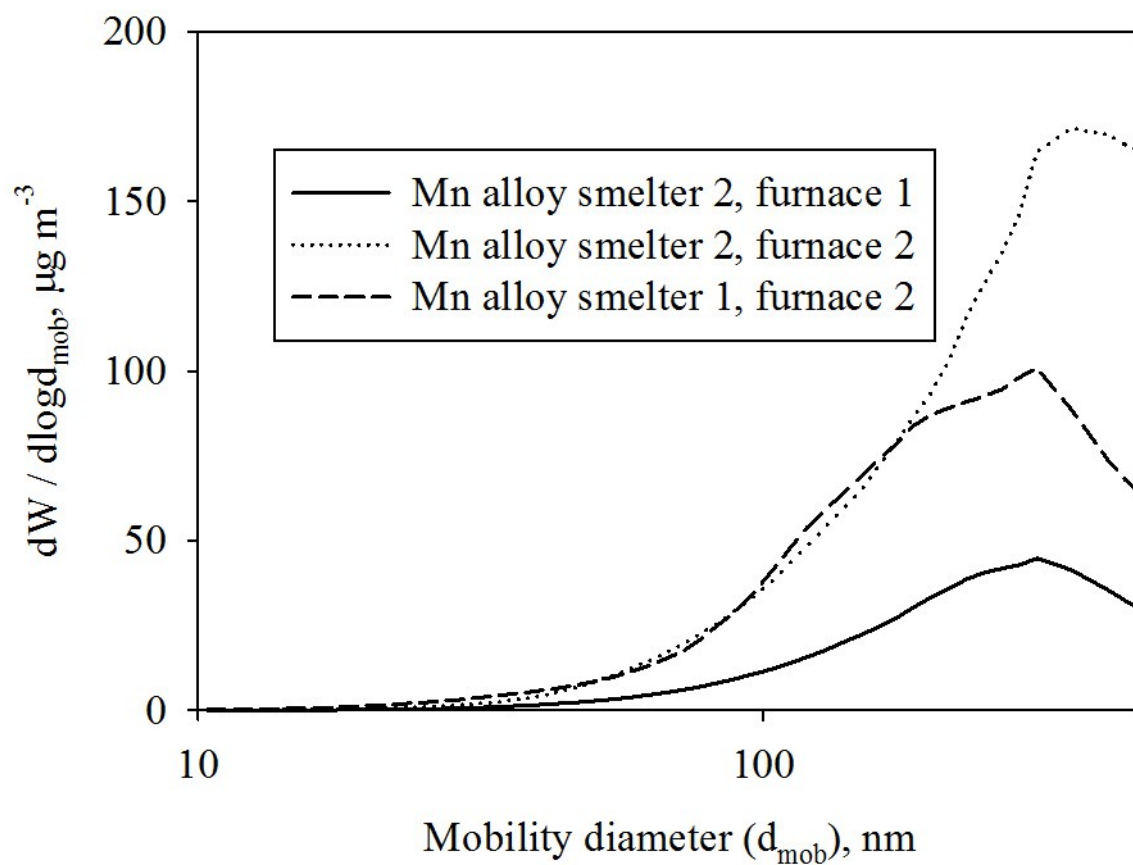

Supplement: c5em00396b1.pdf [file c5em00396b1.pdf]
